# Supplementary material for: Peptidoglycan Association of Murein Lipoprotein Is Required for KpsD-Dependent Group 2 Capsular Polysaccharide Expression and Serum Resistance in a Uropathogenic Escherichia coli Isolate
Source: PubMed Central journal article supplement (PMC5442458; doi:10.1128/mbio.00603-17), 2017-05-23

A

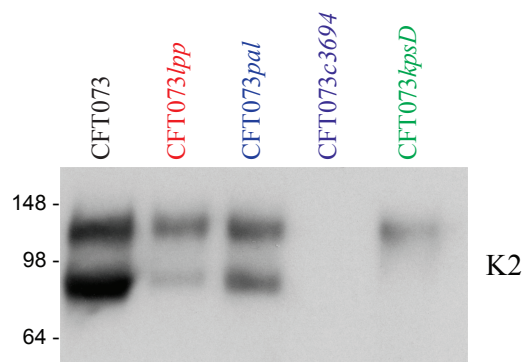

B

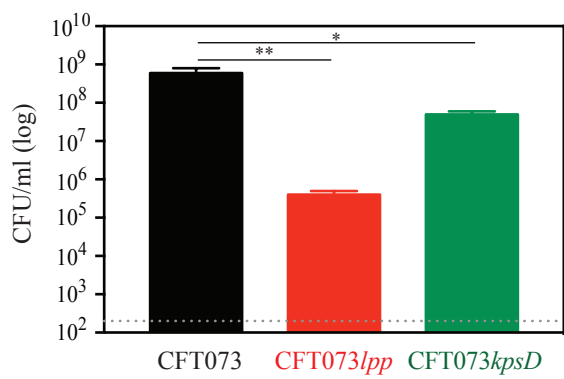

C

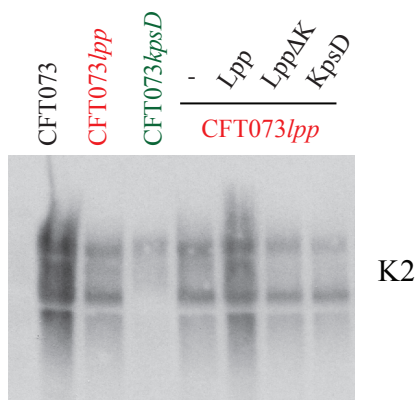

Supplement: mbo003173319sf3.pdf [file mbo003173319sf3.pdf]
